# Supplementary material for: Comparative population genetics of swimming crab host (Portunus pelagicus) and common symbiotic barnacle (Octolasmis angulata) in Vietnam
Source: PeerJ. 2021 Jul 7;9:e11671. doi: 10.7717/peerj.11671 (PMC8272463; doi:10.7717/peerj.11671)
Supplement: Supplemental Information 3 — The measurements of swimming crab (Portunus pelagicus) following the geographic locations, and the symbiotic status (number of symbionts), and the common symbiotic barnacle Octolasmis angulata (number of individuals). [file peerj-09-11671-s003.xls]

## Sheet: 479 Indiv.
Location	Sample code	Carapace width (mm)	Infestation status	Octolamis angulata Infection (Number of individuals)		Octolamis angulata Infection rate	Number of individuals	%
QN	QN1	108	6	209		No infection	117	24.4259
	QN2	89	0	0		Light (1-10)	131	27.3486
	QN3	103	1	1		Medium (11-50)	104	21.7119
	QN4	92	3	3		Heavy (>50)	127	26.5136
	QN5	90	4	5		Total	479	100
	QN6	90	2	2
	QN7	99	5	11
	QN8	100	3	13
	QN9	100	2	13
	QN10	95	3	13
	QN11	96	2	6
	QN12	82	2	15
	QN13	97	1	17
	QN14	95	2	8
	QN15	87	4	38
	QN16	98	1	16
	QN17	91	4	8
	QN18	88	5	4
	QN19	99	4	9
	QN20	89	1	0
	QN21	98	2	32
	QN22	100	2	51
	QN23	95	5	40
	QN24	102	3	7
	QN25	89	1	18
	QN26	92	3	26
	QN27	97	3	8
	QN28	98	2	32
	QN29	123	2	57
	QN30	125	2	29					479
	QN31	94	2	20
	QN32	129	2	34
	QN33	80	2	1
	QN34	80	3	8
	QN35	75	3	5
	QN36	86	4	8
	QN37	102	3	54
	QN38	80	0	0
	QN39	85	1	4
	QN40	90	1	8
	QN41	89	2	13
	QN42	85	1	2
	QN43	85	0	0
	QN44	86	3	10
	QN45	98	2	4
	QN46	85	2	2
	QN47	90	2	3
	QN48	109	3	18
	QN49	87	4	16
	QN50	83	1	18
	QN51	115	1	2
	QN52	116	2	131
	QN53	124	2	64
	QN54	104	4	6
	QN55	110	2	50
	QN56	114	2	47
	QN57	118	1	0
	QN58	100	4	12
HP	HP1	125	0	234
	HP2	145	1	320
	HP3	123	0	69
	HP4	124	0	53
	HP5	121	0	22
	HP6	126	4	72
	HP7	136	0	50
	HP8	122	0	0
	HP9	155	1	128
	HP10	130	0	230
	HP11	130	0	20
	HP12	121	0	7
	HP13	136	0	90
	HP14	138	0	221
	HP15	93	2	6
	HP16	95	0	2
	HP17	90	2	3
	HP18	99	0	0
	HP19	97	0	2
	HP20	91	0	65
	HP21	90	0	3
	HP22	95	0	0
	HP23	105	0	0
	HP24	110	2	5
	HP25	145	4	116
	HP26	117	4	40
	HP27	125	2	65
	HP28	118	2	79
	HP29	124	4	5
	HP30	124	4	3
	HP31	128	4	30
	HP32	128	6	95
	HP33	135	6	117
	HP34	140	3	97
	HP35	150	3	105
	HP36	122	4	87
	HP37	138	3	170
	HP38	142	3	95
	HP39	128	5	83
	HP40	135	4	176
	HP41	130	5	92
	HP42	140	3	75
	HP43	134	4	220
	HP44	137	4	270
	HP45	121	3	70
	HP46	120	2	52
	HP47	135	3	140
	HP48	132	3	130
	HP49	133	5	110
	HP50	119	3	77
	HP51	160	5	193
	HP52	133	5	57
	HP53	130	4	90
	HP54	128	3	31
	HP55	138	3	65
	HP56	143	4	5
	HP57	130	3	118
	HP58	130	4	21
	HP59	113	6	225
	HP60	125	2	96
	HP61	128	4	163
	HP62	130	3	225
	HP63	125	5	179
	HP64	140	4	212
	HP65	134	3	152
	HP66	120	4	145
	HP67	125	4	116
	HP68	130	3	177
	HP69	135	4	125
	HP70	130	5	226
	HP71	69	0	0
	HP72	67	1	3
	HP73	62	0	0
	HP74	58	0	0
	HP75	78	0	0
	HP76	77	4	6
	HP77	77	0	0
	HP78	72	0	0
	HP79	78	1	0
	HP80	78	0	0
	HP81	76	0	0
	HP82	74	0	0
	HP83	62	0	0
	HP84	58	0	0
	HP85	78	2	2
	HP86	77	0	0
	HP87	77	2	8
	HP88	72	0	0
	HP89	58	0	0
	HP90	78	0	0
	HP91	77	0	0
KH	KH1	69	0	0
	KH2	67	0	0
	KH3	62	0	0
	KH4	58	0	0
	KH5	78	0	0
	KH6	77	0	0
	KH7	77	0	0
	KH8	72	0	0
	KH9	78	0	0
	KH10	78	0	0
	KH11	76	0	0
	KH12	74	0	0
	KH13	89	1	1
	KH14	92	1	4
	KH15	86	1	2
	KH16	96	1	0
	KH17	87	2	15
	KH18	89	1	1
	KH19	105	5	135
	KH20	105	0	0
	KH21	92	0	0
	KH22	100	5	109
	KH23	120	4	24
	KH24	93	3	5
	KH25	93	0	0
	KH26	110	2	214
	KH27	100	6	56
	KH28	120	2	142
	KH29	110	2	60
	KH30	88	0	0
	KH31	92	1	0
	KH32	123	3	26
	KH33	142	1	12
	KH34	133	2	45
	KH35	112	4	165
	KH36	118	4	4
	KH37	114	1	43
	KH38	125	5	103
	KH39	114	1	32
	KH40	108	1	0
	KH41	98	1	0
	KH42	103	1	0
	KH43	97	1	0
	KH44	101	1	0
	KH45	72	1	0
	KH46	115	3	331
	KH47	105	3	21
	KH48	151	1	67
	KH49	122	0	0
	KH50	114	3	306
	KH51	110	1	0
	KH52	115	3	133
	KH53	112	3	16
	KH54	113	2	58
	KH55	105	3	20
	KH56	107	1	10
	KH57	93	0	0
	KH58	97	1	0
	KH59	108	0	0
	KH60	92	0	0
	KH61	98	1	0
	KH62	98	1	0
	KH63	98	1	9
	KH64	95	2	3
	KH65	95	0	0
	KH66	98	0	0
	KH67	96	0	0
	KH68	95	1	10
	KH69	96	0	0
	KH70	97	1	0
	KH71	97	0	0
	KH72	96	1	5
	KH73	92	0	0
	KH74	92	0	0
	KH75	98	1	21
	KH76	115	2	2
	KH77	109	1	2
	KH78	104	0	0
	KH79	108	4	0
	KH80	113	5	65
	KH81	96	3	22
	KH82	105	4	58
	KH83	103	3	43
	KH84	115	6	144
	KH85	112	7	210
	KH86	107	3	19
	KH87	92	1	8
	KH88	78	1	4
	KH89	85	3	12
	KH90	83	2	2
	KH91	103	6	41
	KH92	77	1	154
	KH93	132	6	231
	KH94	141	8	117
	KH95	131	3	96
	KH96	130	4	133
	KH97	133	6	211
	KH98	140	4	94
	KH99	134	3	18
	KH100	137	5	198
PY	PY1	98	1	22
	PY2	80	1	6
	PY3	80	0	0
	PY4	87	2	5
	PY5	76	1	4
	PY6	80	1	2
	PY7	70	0	0
	PY8	112	1	34
	PY9	105	0	0
	PY10	83	2	2
	PY11	100	1	7
	PY12	90	1	0
	PY13	100	0	0
	PY14	95	1	28
	PY15	85	2	8
	PY16	85	2	3
	PY17	101	1	21
	PY18	85	0	0
	PY19	80	0	0
	PY20	91	1	0
	PY21	82	1	3
	PY22	85	1	5
	PY23	80	0	0
	PY24	79	0	0
	PY25	75	1	1
	PY26	70	1	2
	PY27	72	0	0
	PY28	135	5	0
	PY29	132	4	105
	PY30	127	6	208
	PY31	110	1	3
	PY32	101	1	8
	PY33	112	1	0
	PY34	112	2	15
	PY35	115	3	17
	PY36	110	2	77
	PY37	115	2	10
	PY38	95	3	1
	PY39	127	2	14
	PY40	112	1	16
	PY41	107	1	2
	PY42	114	1	25
	PY43	97	1	1
	PY44	108	2	97
	PY45	111	2	2
	PY46	117	2	2
	PY47	122	2	8
	PY48	114	2	11
	PY49	101	2	19
	PY50	125	4	230
	PY51	101	5	178
	PY52	95	3	79
	PY53	97	2	40
	PY54	105	4	216
	PY55	94	4	87
	PY56	90	3	7
	PY57	83	4	9
	PY58	125	4	177
	PY59	118	2	70
	PY60	130	2	5
	PY61	122	4	79
	PY62	128	3	1200
	PY63	95	3	120
	PY64	89	2	6
	PY65	122	2	82
	PY66	98	1	20
	PY67	97	3	35
	PY68	105	2	30
	PY69	95	2	173
	PY70	82	1	10
	PY71	105	4	85
	PY72	99	2	75
	PY73	83	1	15
	PY74	112	2	12
	PY75	107	3	13
	PY76	102	1	106
	PY77	100	1	42
	PY78	97	1	53
	PY79	85	3	58
	PY80	100	2	40
	PY81	98	5	32
	PY82	106	2	40
	PY83	89	1	20
	PY84	93	3	22
	PY85	101	2	118
	PY86	86	3	46
	PY87	99	2	4
	PY88	96	2	15
	PY89	104	1	91
	PY90	91	3	9
	PY91	130	3	46
	PY92	116	6	124
	PY93	124	3	84
	PY94	78	1	12
	PY95	78	1	0
	PY96	120	1	78
	PY97	79	1	2
	PY98	115	3	93
	PY99	132	6	64
	PY100	76	1	2
KG	KG1	131	3	41
	KG2	138	3	5
	KG3	140	2	36
	KG4	140	2	43
	KG5	142	2	28
	KG6	135	2	78
	KG7	130	1	1
	KG8	138	1	5
	KG9	140	3	30
	KG10	145	3	7
	KG11	133	3	12
	KG12	135	4	69
	KG13	132	5	22
	KG14	146	2	3
	KG15	140	3	4
	KG16	140	3	23
	KG17	125	2	15
	KG18	133	3	55
	KG19	136	2	14
	KG20	138	2	8
	KG21	114	3	14
	KG22	95	2	0
	KG23	112	2	2
	KG24	112	2	29
	KG25	120	1	22
	KG26	95	0	0
	KG27	118	3	42
	KG28	112	4	18
	KG29	113	2	8
	KG30	126	2	33
	KG31	98	0	0
	KG32	114	2	53
	KG33	139	3	51
	KG34	125	0	0
	KG35	115	2	1
	KG36	122	2	1
	KG37	109	0	0
	KG38	117	1	3
	KG39	110	2	3
	KG40	101	1	0
	KG41	109	1	2
	KG42	116	1	1
	KG43	110	2	35
	KG44	94	2	38
	KG45	95	0	0
	KG46	123	1	2
	KG47	98	1	0
	KG48	130	5	322
	KG49	156	4	385
	KG50	127	3	216
	KG51	140	2	146
	KG52	130	2	52
	KG53	155	5	380
	KG54	148	4	182
	KG55	134	4	211
	KG56	125	3	22
	KG57	108	2	0
	KG58	98	3	8
	KG59	94	2	2
	KG60	82	2	2
	KG61	108	2	7
	KG62	96	2	63
	KG63	105	2	9
	KG64	102	1	0
	KG65	97	1	22
	KG66	125	1	4
	KG67	108	3	4
	KG68	108	0	0
	KG69	112	1	20
	KG70	113	1	4
	KG71	113	2	2
	KG72	113	2	12
	KG73	108	1	2
	KG74	109	1	6
	KG75	108	1	7
	KG76	105	4	21
	KG77	115	2	18
	KG78	135	2	67
	KG79	95	2	8
	KG80	100	3	6
	KG81	100	1	9
	KG82	115	0	0
	KG83	120	1	6
	KG84	115	1	2
	KG85	100	3	9
	KG86	140	3	18
	KG87	105	1	3
	KG88	100	1	4
	KG89	95	1	16
PQ	PQ1	69	0	0
	PQ2	67	0	0
	PQ3	62	0	0
	PQ4	58	0	0
	PQ5	78	0	0
	PQ6	77	3	4
	PQ7	77	0	0
	PQ8	72	0	0
	PQ9	78	1	0
	PQ10	78	0	0
	PQ11	76	1	2
	PQ12	74	0	0
	PQ13	62	0	0
	PQ14	58	0	0
	PQ15	78	0	0
	PQ16	77	0	0
	PQ17	77	2	8
	PQ18	72	0	0
	PQ19	58	0	0
	PQ20	78	0	0
	PQ21	77	0	0
	PQ22	98	3	8
	PQ23	94	2	2
	PQ24	82	2	2
	PQ25	96	2	63
	PQ26	97	1	22
	PQ27	96	3	63
	PQ28	98	3	8
	PQ29	94	2	2
	PQ30	98	1	0
	PQ31	94	3	38
	PQ32	95	0	0
	PQ33	98	0	0
	PQ34	95	0	0
	PQ35	95	2	0
	PQ36	98	4	8
	PQ37	94	2	2
	PQ38	82	3	2
	PQ39	96	2	63
	PQ40	97	1	22
	PQ41	96	2	63

## Sheet: 160 Indiv.
No.	Location	Sample Code	Infestation status (Number of symbionts)			North (64)				Central (64)				South (32)
1	QN	QN22	51			QN/HP				KH/PY				KG/PQ
2		QN18	4			High	Medium	Light	Non	High	Medium	Light	Non	High	Medium	Light	Non
3		QN6	2		Non-infection (0)				7				19				8
4		QN38	0		Light (1 -10)			24				17				5
5		QN47	3		Medium (11 - 50)		12				15				13
6		QN56	47		High (>= 50)	21				13				6
7		QN55	50		Percent (%)	32.8125	18.75	37.5	10.9375	20.3125	23.4375	26.5625	29.6875	18.75	40.625	15.625	25
8		QN30	29
9		QN34	8
10		QN33	1			North (64)	Central (64)	South (32)
11		QN14	8		Non-infection (0)	10.9375	29.6875	25
12		QN27	8		Light (1 -10)	37.5	26.5625	15.625
13		QN35	5		Medium (11 - 50)	18.75	23.4375	40.625
14		QN50	18		Heavy (>= 50)	32.8125	20.3125	18.75
15		QN53	64
16		QN54	6
17		QN57	0
18		QN3	1
19		QN12	15
20		QN11	6
21		QN29	57
22		QN17	8
23		QN1	209
24		QN7	11
25		QN13	17
26		QN9	13
27		QN44	10
28		QN37	54
29		QN4	3
30		QN27	8
31		QN55	50
32		QN15	38
33	HP	HP11	20
34		HP17	3
35		HP18	0
36		HP56	5
37		HP8	0
38		HP15	6
39		HP60	96
40		HP14	221
41		HP16	2
42		HP1	234
43		HP28	79
44		HP36	87
45		HP24	5
46		HP67	116
47		HP6	72
48		HP30	3
49		HP3	69
50		HP9	128
51		HP22	0
52		HP38	95
53		HP19	2
54		HP20	65
55		HP21	3
56		HP22	0
57		HP23	0
58		HP25	116
59		HP26	40
60		HP27	65
61		HP29	5
62		HP31	30
63		HP44	270
64		HP54	31
1	KH	KH47	21
2		KH31	0
3		KH45	0
4		KH32	26
5		KH44	0
6		KH37	43
7		KH50	306
8		KH42	0
9		KH64	3
10		KH29	60
11		KH35	165
12		KH34	45
13		KH38	103
14		KH39	32
15		KH20	0
16		KH21	0
17		KH27	56
18		KH28	142
19		KH29	60
20		KH33	12
21		KH41	0
22		KH46	331
23		KH22	109
24		KH23	24
25		KH24	5
26		KH66	0
27		KH25	0
28		KH68	10
29		KH8	0
30		KH14	4
31		KH55	20
32		KH36	4
33	PY	PY54	216
34		PY6	2
35		PY8	34
36		PY24	0
37		PY19	0
38		PY10	2
39		PY7	0
40		PY52	79
41		PY55	87
42		PY22	5
43		PY26	2
44		PY47	8
45		PY56	7
46		PY67	35
47		PY24	0
48		PY27	0
49		PY1	22
50		PY2	6
51		PY3	0
52		PY4	5
53		PY11	7
54		PY13	0
55		PY14	28
56		PY15	8
57		PY16	3
58		PY17	21
59		PY23	0
60		PY25	1
61		PY17	21
62		PY23	0
63		PY68	30
64		PY78	53
1	KG	KG78	67
2		KG70	4
3		KG65	22
4		KG23	2
5		KG44	38
6		KG24	29
7		KG11	12
8		KG72	12
9		KG22	0
10		KG11	12
11		KG12	69
12		KG36	1
13		KG37	0
14		KG30	33
15		KG8	5
16		KG25	22
17		KG31	0
18	PQ	PQ65	22
19		PQ44	38
20		PQ82	0
21		PQ69	20
22		PQ70	4
23		PQ78	67
24		PQ39	63
25		PQ43	35
26		PQ55	211
27		PQ32	0
28		PQ33	0
29		PQ25	63
30		PQ21	0
31		PQ45	0
32		PQ56	22
